# Supplementary material for: A stable version of capillary electrophoresis for determining human hemoglobin chains aiming at the screening and diagnosis of thalassemia
Source: Royal Society of Chemistry journal article supplement (doi:10.1039/d0ay00384k), 2020-01-01
Supplement: d0ay00384k1.pdf [file d0ay00384k1.pdf]

# **A stable version of capillary electrophoresis for determining the human hemoglobin chains aiming at the screening and diagnosis of thalassemia**

Chao Guo, Qianchun Zhang, Linchun Bao, Hongliang Li, Qingfeng Zheng, Zhenpeng Guo\*, Yi Chen\*

## **Supplementary material**

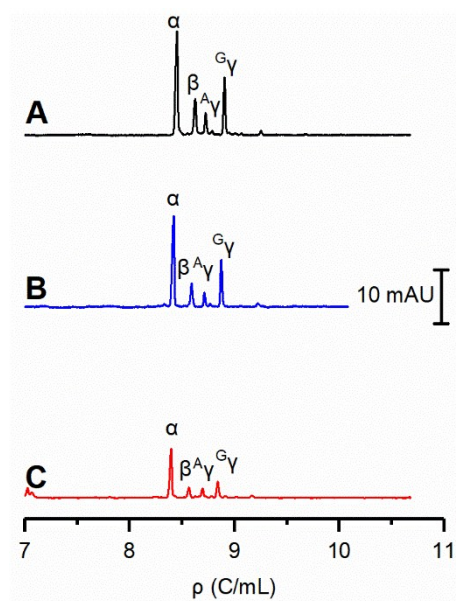

Fig. S1. Separation of globin chains in 3 M acetic acid containing 0.1% (w/v) HEC by pretreatment of 3.0 mg/mL Hb AF with acetone-HCl (A) or direct injection of 3.0 mg/mL Hb AF (B) and a whole blood sample from newborn (C). The total analytical time from about 1.5 h (A) to less than 20 min (B and C). Capillary length: 55 cm (50 cm effective length), 50  $\mu$ m ID; Voltage: 18 kV; Injection: hydrostatics at 25 cm elevation for 20 s; Detection: 214 nm.

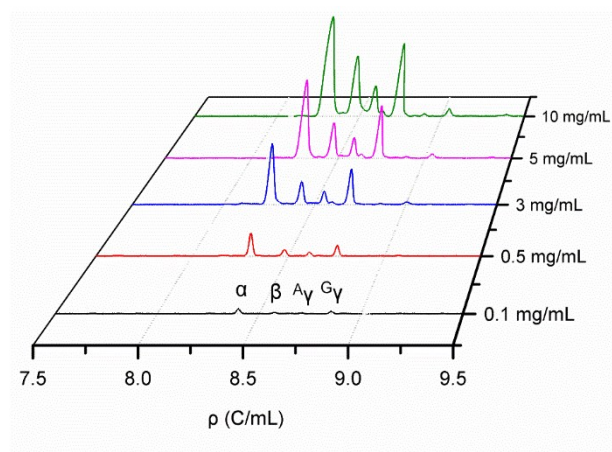

Fig. S2. The performance of the  $\rho$ -CE method on a wide range of Hb AF concentrations. Other conditions as in Fig. S1.
